# Supplementary material for: A specimen-level phylogenetic analysis and taxonomic revision of Diplodocidae (Dinosauria, Sauropoda)
Source: PeerJ. 2015 Apr 7;3:e857. doi: 10.7717/peerj.857 (PMC4393826; doi:10.7717/peerj.857)
Supplement: Supplemental Information 6 [file peerj-03-857-s006.xlsx]

## Sheet: ew constraints
Supplementary Data 2
Constrained searches with equal weighting
Taxon under question	constraint	TNT command	tree length	absolute increase	relative increase
Dystrophaeus viaemalae USNM 2364	Dicraeosauridae	Force+[10 25 26 27 28]	1976	0	0
	Camarasauridae	Force+[5 6 7 8 9 10 11 (37)]	1976	0	0
	Titanosauriformes	Force+[10 12 13 14 (15 16 17 37)]	1978	2	0.00101215
Amphicoelias altus AMNH 5764	close to Supersaurus	Force+[24 46 47 48 (15 44)]	1979	3	0.00151822
	outside Apatosaurinae	Force+[29 30 31 32 33 34 35 36 38 39 40 41 42 79 (37 43 45 63)]	1978	2	0.00101215
Apatosaurus ajax YPM 1860	close to Elosaurus	Force+[29 35 36 79]	1980	4	0.00202429
Atlantosaurus immanis YPM 1840	with Apatosaurus laticollis	Force+[30 34]	1977	1	0.000506073
Diplodocus longus YPM 1920	with AMNH 223	Force+[52 56]	1978	2	0.00101215
Barosaurus affinis YPM 419	Barosaurus	Force+[67 68 69 71 72 (53 61 75 77)]	1977	1	0.000506073
Elosaurus parvus CM 566	with UW 15556	Force+[35 36]	1980	4	0.00202429
Tornieria africana	Barosaurus	Force+[50 51 67 69 71 (61 72 75 77)]	1985	9	0.00455466
Apatosaurus minimus AMNH 675	Titanosauriformes	Force+[12 13 14 16 17 37 (10 15)]	1977	1	0.000506073
	Apatosaurinae	Force+[29 30 31 32 33 34 35 36 37 38 39 40 41 42 79 (10 24 43)]	1977	1	0.000506073
	Camarasauridae	Force+[5 6 7 8 9 11 37 (10)]	1976	0	0
Galeamopus hayi HMNS 175	with Diplodocus	Force+[52 54 55 56 57 58 64 66 (53 60 62)]	1984	8	0.00404858
Cetiosauriscus stewarti NHMUK R3078	with Omeisaurus and Mamenchisaurus	Force+[2 3 73 (68)]	1980	4	0.00202429
Dyslocosaurus polyonychius AC 663	Apatosaurinae	Force+[29 30 31 32 33 34 35 36 38 39 40 41 42 74 79 (10 24 37 43)]	1980	4	0.00202429
	Diplodocinae	Force+[46 47 48 49 50 51 52 54 55 56 57 58 59 60 61 62 64 65 66 67 69 70 71 72 74 75 76 77 78 80 (15 43 44 45 53 63)]	1978	2	0.00101215
Suuwassea emilieae ANS 21122	Apatosaurinae	Force+[28 29 30 31 32 33 34 35 36 38 39 40 41 42 79 (10 24 37 43)]	1991	15	0.00759109
	Diplodocinae	Force+[28 47 48 49 50 51 52 54 55 56 57 58 59 60 61 62 64 65 66 67 69 70 71 72 75 76 77 78 80 (15 43 44 45 53 63)]	1990	14	0.00708502
Australodocus	outside Diplodocinae	Force+[45 46 47 48 49 50 51 52 54 55 56 57 58 59 60 61 62 63 64 65 66 67 69 70 71 72 75 76 77 78 80 (43 44 53)]	1976	0	0
	Titanosauriformes	Force+[12 13 14 15 (10 16 17 37)]	1979	3	0.00151822
	with Supersaurus	Force+[15 46 47 48 (44)]	1977	1	0.000506073
Leinkupal laticauda	with Tornieria	Force+[50 51 80]	1977	1	0.000506073
AMNH 460	Apatosaurus	Force+[29 30 33 40 41 42 (37)]	1978	2	0.00101215
	Brontosaurus	Force+[31 32 35 36 38 41 79 (10 24 37 43)]	1979	3	0.00151822
	„Atlantosaurus“	Force+[34 39 41]	1981	5	0.00253036
AMNH 969	Diplodocus	Force+[52 54 55 56 57 58 59 66 (53 60 61 62)]	1980	4	0.00202429
AMNH 7530	Barosaurus	Force+[67 69 71 72 70 (61 75 77)]	1984	8	0.00404858
CM 3452	Diplodocus	Force+[52 54 55 56 57 58 61 66 (53 60 62 75 77)]	1977	1	0.000506073
	Kaatedocus	Force+[49 61 70 76 (75 77)]	1977	1	0.000506073
	Barosaurus	Force+[61 67 69 71 72 (68 75 77)]	1977	1	0.000506073
CM 11161	Galeamopus	Force+[59 60 64 65 78 (44 53 62)]	1977	1	0.000506073
	Kaatedocus	Force+[49 60 70 76 (53 61 62 75 77)]	1978	2	0.00101215
CM 11255	Diplodocus	Force+[52 54 55 56 57 58 66 77 (53 60 61 62 75)]	1977	1	0.000506073
FMNH P25112	Apatosaurinae	Force+[29 30 31 32 33 34 35 36 38 39 40 41 42 43 79 (10 24 37)]	1977	1	0.000506073
	Brontosaurus	Force+[31 32 35 36 38 43 79 (10 24 29 37 41)]	1979	3	0.00151822
ML 418	outside Galeamopus	Force+[59 64 65 78 (53)]	1977	1	0.000506073
	Dinheirosaurus	Force+[44 48 (15 46 47)]	1978	2	0.00101215
	Apatosaurus	Force+[29 30 33 40 42 44 (37 41)]	1980	4	0.00202429
NSMT-PV 20375	Apatosaurus ajax	Force+[29 39 (30 34 41 43 79)]	1979	3	0.00151822
SMA 0009	Apatosaurinae	Force+[13 29 30 31 32 33 34 35 36 38 39 40 41 42 79 (10 24 37 43 53)]	1993	17	0.00860324
	Diplodocinae	Force+[13 47 48 49 50 51 52 54 55 56 57 58 59 60 61 62 64 65 66 67 69 70 71 72 75 76 77 78 80 (15 43 44 45 53 63)]	2009	33	0.0167004
USNM 2672	Galeamopus	Force+[59 62 64 65 78 (44 53 60)]	1977	1	0.000506073
	Kaatedocus	Force+[49 62 70 76 (53 60 61 75 77)]	1978	2	0.00101215
USNM 2673	Diplodocus	Force+[52 54 55 56 57 58 66 78 (53 60 61 62 75 77)]	1978	2	0.00101215
WDC-FS001A	Diplodocus	Force+[52 54 55 56 57 58 63 66 (45 53 60 61 62 75 77)]	1982	6	0.00303644

## Sheet: iw constraints
Constrained searches with implied weighting
Taxon under question	constraint	TNT command	tree length	absolute increase	relative increase
Dystrophaeus viaemalae USNM 2364	Camarasauridae	Force+[5 6 7 8 9 10 11 (37)]	194.227	0.01082	5.57112e-05
	Titanosauriformes	Force+[10 12 13 14 (15 16 17 37)]	194.333	0.11677	0.000601238
	outside Dicraeosauridae	Force+[25 26 27 28 (74)]	194.227	0.01082	5.57112e-05
Amphicoelias altus AMNH 5764	close to Supersaurus	Force+[24 46 47 48 (15 44)]	194.422	0.20573	0.00105928
	outside Apatosaurinae	Force+[29 30 31 32 33 34 35 36 38 39 40 41 42 79 (37 43 45 63)]	194.243	0.02648	0.000136343
Apatosaurus ajax YPM 1860	close to A. Louisae	Force+[29 30 33 40 42]	194.269	0.05306	0.000273201
Atlantosaurus immanis YPM 1840	with Apatosaurus laticollis	Force+[30 34]	194.575	0.3588	0.00184743
Diplodocus longus YPM 1920	with AMNH 223	Force+[52 56]	194.387	0.17142	0.000882625
Barosaurus affinis YPM 419	Barosaurus	Force+[67 68 69 71 72 (53 61 75 77)]	194.316	0.1	0.000514891
Elosaurus parvus CM 566	with UW 15556	Force+[35 36]	194.377	0.16089	0.000828407
Tornieria africana	with Barosaurus	Force+[50 51 67 69 71 (61 72 75 77)]	195.308	1.09192	0.00562219
Apatosaurus minimus AMNH 675	Apatosaurinae	Force+[29 30 31 32 33 34 35 36 37 38 39 40 41 42 79 (10 24 43)]	194.434	0.21804	0.00112267
	Camarasauridae	Force+[5 6 7 8 9 11 37 (10)]	194.425	0.20851	0.0010736
Galeamopus hayi HMNS 175	with Diplodocus	Force+[52 54 55 56 57 58 64 66 (53 60 62)]	194.67	0.45413	0.00233827
Cetiosauriscus stewarti NHMUK R3078	Dicraeosauridae	Force+[25 26 27 28 73 (10 68)]	194.816	0.6001	0.00308986
	Rebbachisauridae	Force+[19 20 21 22 23 73 (68)]	195.152	0.93583	0.0048185
Dyslocosaurus polyonychius AC 663	Apatosaurinae	Force+[29 30 31 32 33 34 35 36 38 39 40 41 42 74 79 (10 24 37 43)]	194.384	0.16796	0.00086481
	Diplodocinae	Force+[46 47 48 49 50 51 52 54 55 56 57 58 59 60 61 62 64 65 66 67 69 70 71 72 74 75 76 77 78 80 (15 43 44 45 53 63)]	194.267	0.05119	0.000263572
Suuwassea emilieae ANS 21122	Apatosaurinae	Force+[28 29 30 31 32 33 34 35 36 38 39 40 41 42 79 (10 24 37 43)]	195.503	1.28683	0.00662577
	Diplodocinae	Force+[28 47 48 49 50 51 52 54 55 56 57 58 59 60 61 62 64 65 66 67 69 70 71 72 75 76 77 78 80 (15 43 44 45 53 63)]	196.004	1.78807	0.0092066
Australodocus bohetii	Outside Dinheirosaurus + Supersaurus	Force+[46 47 48]	194.25	0.03351	0.00017254
	outside Diplodocinae	Force+[45 46 47 48 49 50 51 52 54 55 56 57 58 59 60 61 62 63 64 65 66 67 69 70 71 72 75 76 77 78 80 (43 44 53)]	194.25	0.03351	0.00017254
	Titanosauriformes	Force+[12 13 14 15 (10 16 17 37)]	194.397	0.18084	0.000931128
Leinkupal laticauda	with Tornieria	Force+[50 51 80]	194.446	0.23	0.00118425
AMNH 460	Apatosaurus	Force+[29 30 33 40 41 42 (37)]	194.533	0.31726	0.00163354
	Brontosaurus	Force+[31 32 35 36 38 41 79 (10 24 37 43)]	194.561	0.34453	0.00177395
	„Atlantosaurus“	Force+[34 39 41]	194.375	0.15911	0.000819242
AMNH 969	Diplodocus	Force+[52 54 55 56 57 58 59 66 (53 60 61 62)]	194.376	0.16039	0.000825833
AMNH 7530	Barosaurus	Force+[67 69 71 72 70 (61 75 77)]	194.911	0.69542	0.00358065
CM 3452	Diplodocus	Force+[52 54 55 56 57 58 61 66 (53 60 62 75 77)]	194.279	0.06258	0.000322219
	Kaatedocus	Force+[49 61 70 76 (75 77)]	194.235	0.01923	9.90135e-05
	Barosaurus	Force+[61 67 69 71 72 (68 75 77)]	194.254	0.03817	0.000196534
CM 11161	Galeamopus	Force+[59 60 64 65 78 (44 53 62)]	194.287	0.07142	0.000367735
	Kaatedocus	Force+[49 60 70 76 (53 61 62 75 77)]	194.335	0.11923	0.000613904
CM 11255	Diplodocus	Force+[52 54 55 56 57 58 66 77 (53 60 61 62 75)]	194.266	0.05	0.000257445
FMNH P25112	Diplodocinae	Force+[43 46 47 48 49 50 51 52 54 55 56 57 58 59 60 61 62 64 65 66 67 69 70 71 72 75 76 77 78 80 (15 44 45 53 63)]	194.269	0.05286	0.000272171
ML 418	outside Galeamopus	Force+[59 64 65 78 (53)]	194.216	0.0001	5.14891e-07
	Dinheirosaurus	Force+[44 48 (15 46 47)]	194.253	0.03735	0.000192312
	Apatosaurus	Force+[29 30 33 40 42 44 (37 41)]	194.791	0.57546	0.00296299
NSMT-PV 20375	Apatosaurus ajax	Force+[29 39 (30 34 41 43 53 79)]	194.521	0.30465	0.00156861
SMA 0009	Apatosaurinae	Force+[13 29 30 31 32 33 34 35 36 38 39 40 41 42 79 (10 24 37 43 53)]	195.505	1.2885	0.00663436
	Diplodocinae	Force+[13 47 48 49 50 51 52 54 55 56 57 58 59 60 61 62 64 65 66 67 69 70 71 72 75 76 77 78 80 (15 43 44 45 53 63)]	197.344	3.12785	0.016105
	Brachiosauridae	Force+[12 13 14]	194.322	0.10624	0.00054702
USNM 2672	Galeamopus	Force+[59 62 64 65 78 (44 53 60)]	194.287	0.07142	0.000367735
	Kaatedocus	Force+[49 62 70 76 (53 60 61 75 77)]	194.335	0.11923	0.000613904
USNM 2673	Diplodocus	Force+[52 54 55 56 57 58 66 78 (53 60 61 62 75 77)]	194.421	0.20476	0.00105429
WDC-FS001A	Diplodocus	Force+[52 54 55 56 57 58 63 66 (45 53 60 61 62 75 77)]	194.586	0.36994	0.00190479
